# Supplementary material
Source: PubMed Central journal article supplement (PMC3044361)
Supplement: 1019432108_pnas.1019432108_SI.pdf [file 1019432108_pnas.1019432108_SI.pdf]

# Supporting Information

Di Giuseppe et al. 10.1073/pnas.1019432108

**Table S1. Geographic origin of *Euplotes nobilii* strains**

| Strains          | Collection sites                                | Latitude/longitude | Isolator, year     |
|------------------|-------------------------------------------------|--------------------|--------------------|
| <i>Antarctic</i> |                                                 |                    |                    |
| AC-1             | Icaro Faraglione Campus (Antarctica)            | S 74°41'/E 163°59' | Valbonesi A., 1988 |
| Far              | "                                               | "                  | "                  |
| Sop              | "                                               | "                  | "                  |
| AC-3             | Observatory Forecast Campus (Antarctica)        | S 74°44'/E 164°00' | "                  |
| AC-4             | Edmonson Point (Antarctica)                     | S 74°19'/E 165°07' | "                  |
| AC-5             | "                                               | "                  | "                  |
| Ed.Po-6          | "                                               | "                  | Luporini P., 2003  |
| <i>Fuegian</i>   |                                                 |                    |                    |
| IsH3-1           | Hoste Island, Tierra del Fuego (Chile)          | S 55°15'/W 69°00'  | Luporini P., 2008  |
| PA1-1            | Punta Arenas, Tierra del Fuego (Chile)          | S 53°08'/W 70°54'  | "                  |
| PNA-1h           | Puerto Natales, Tierra del Fuego (Chile)        | S 51°43'/W 72°31'  | "                  |
| PUN1             | Pinguinera Seno Otway, Tierra del Fuego (Chile) | S 52°59'/W 71°14'  | "                  |
| <i>Arctic</i>    |                                                 |                    |                    |
| 1QAA             | Qaanaaq, Greenland (Denmark)                    | N 77°28'/W 69°20'  | Dini F., 2006      |
| 5QAA15           | "                                               | "                  | "                  |
| 2QAN1            | Thule, Greenland (Denmark)                      | N 76°32'/W 68°50'  | "                  |
| 3QAN7            | "                                               | "                  | "                  |
| 4QN9             | Siorapaluk, Greenland (Denmark)                 | N 77°46'/W 70°48'  | "                  |
| 4ILa4            | Ilulissat, Greenland (Denmark)                  | N 69°13'/W 51°06'  | "                  |
| 4Pym4            | Pyramiden, Svalbard (Norge)                     | N 78°39'/E 16°22'  | Dini F., 2004      |

**Table S2. Analytic dataset of the measurements and counts carried out on *E. nobilii* strains**

| Strains          | Morphological traits measured (µm) or counted |              |              |              |             |    |             |   |              |              |              |
|------------------|-----------------------------------------------|--------------|--------------|--------------|-------------|----|-------------|---|--------------|--------------|--------------|
|                  | 1                                             | 2            | 3            | 4            | 5           | 6  | 7           | 8 | 9            | 10           | 11           |
| <i>Antarctic</i> |                                               |              |              |              |             |    |             |   |              |              |              |
| AC-1             | 40.70 ± 1.83                                  | 27.50 ± 2.32 | 23.10 ± 1.29 | 46.20 ± 4.49 | 8.10 ± 0.32 | 10 | 3.60 ± 0.52 | 5 | 8.20 ± 0.42  | 21.20 ± 1.32 | 38.60 ± 0.97 |
| AC-3             | 40.67 ± 1.84                                  | 26.95 ± 2.13 | 23.14 ± 1.23 | 45.53 ± 5.49 | 8.10 ± 0.32 | 10 | 3.50 ± 0.53 | 5 | 7.90 ± 0.32  | 21.20 ± 1.62 | 38.20 ± 1.33 |
| AC-4             | 40.54 ± 2.06                                  | 27.55 ± 2.13 | 23.60 ± 1.15 | 48.58 ± 4.59 | 8.30 ± 0.48 | 10 | 3.20 ± 0.42 | 5 | 8.40 ± 0.70  | 21.30 ± 0.95 | 38.89 ± 0.86 |
| AC-5             | 39.85 ± 2.56                                  | 27.81 ± 1.62 | 23.57 ± 1.77 | 48.40 ± 3.69 | 8.00 ± 0.00 | 10 | 3.70 ± 0.48 | 5 | 8.30 ± 0.67  | 21.30 ± 1.64 | 37.93 ± 1.22 |
| Far              | 41.00 ± 2.11                                  | 27.20 ± 2.86 | 22.90 ± 0.88 | 47.40 ± 3.27 | 8.00 ± 0.00 | 10 | 3.40 ± 0.52 | 5 | 8.40 ± 0.70  | 21.80 ± 1.48 | 38.70 ± 1.16 |
| Sop              | 40.50 ± 2.42                                  | 29.50 ± 2.42 | 22.90 ± 1.29 | 49.30 ± 6.17 | 8.20 ± 0.42 | 10 | 3.40 ± 0.52 | 5 | 8.60 ± 0.70  | 21.30 ± 1.16 | 37.90 ± 1.10 |
| Ed.Po-6          | 42.40 ± 1.65                                  | 29.70 ± 1.89 | 25.60 ± 1.17 | 43.80 ± 3.33 | 7.80 ± 0.63 | 10 | 3.00 ± 0.00 | 5 | 8.70 ± 0.67  | 21.20 ± 1.03 | 35.30 ± 0.82 |
| <i>Fuegian</i>   |                                               |              |              |              |             |    |             |   |              |              |              |
| IsH3-1           | 40.75 ± 1.92                                  | 27.94 ± 2.35 | 22.52 ± 0.77 | 47.69 ± 2.26 | 8.10 ± 0.57 | 10 | 3.40 ± 0.52 | 5 | 8.70 ± 0.67  | 21.60 ± 1.71 | 38.29 ± 1.54 |
| PA1-1            | 40.47 ± 2.67                                  | 25.26 ± 2.95 | 22.77 ± 0.72 | 46.48 ± 2.35 | 8.00 ± 1.05 | 10 | 3.30 ± 0.67 | 5 | 7.90 ± 0.57  | 21.40 ± 1.17 | 38.74 ± 0.96 |
| PNA1-h           | 40.54 ± 2.75                                  | 26.47 ± 3.57 | 23.62 ± 0.86 | 48.14 ± 3.66 | 7.80 ± 1.03 | 10 | 3.40 ± 0.52 | 5 | 8.50 ± 0.53  | 21.50 ± 2.32 | 38.36 ± 1.00 |
| PUN1             | 41.03 ± 2.53                                  | 27.10 ± 2.60 | 23.31 ± 0.82 | 47.32 ± 3.88 | 8.20 ± 0.42 | 10 | 3.30 ± 0.48 | 5 | 8.50 ± 0.71  | 21.80 ± 1.69 | 38.53 ± 1.24 |
| <i>Arctic</i>    |                                               |              |              |              |             |    |             |   |              |              |              |
| 1QAA             | 40.60 ± 1.90                                  | 26.20 ± 1.23 | 24.70 ± 1.16 | 47.80 ± 3.22 | 8.00 ± 0.47 | 10 | 3.00 ± 0.00 | 5 | 9.70 ± 0.48  | 22.50 ± 1.27 | 37.50 ± 1.18 |
| 2QAN1            | 41.94 ± 1.59                                  | 26.42 ± 0.92 | 25.32 ± 1.13 | 48.75 ± 2.59 | 8.10 ± 0.57 | 10 | 3.00 ± 0.00 | 5 | 9.60 ± 0.52  | 22.30 ± 1.34 | 37.09 ± 1.14 |
| 3QAN7            | 40.84 ± 2.04                                  | 26.35 ± 0.93 | 25.57 ± 0.94 | 49.53 ± 5.57 | 8.40 ± 0.52 | 10 | 3.00 ± 0.00 | 5 | 9.30 ± 0.48  | 22.20 ± 1.99 | 37.44 ± 1.21 |
| 4QN9             | 39.90 ± 1.52                                  | 26.80 ± 1.14 | 24.70 ± 0.95 | 46.10 ± 1.79 | 7.60 ± 0.52 | 10 | 3.10 ± 0.32 | 5 | 10.10 ± 0.74 | 23.00 ± 1.33 | 38.30 ± 1.16 |
| 5QAA15           | 40.30 ± 1.42                                  | 27.10 ± 0.99 | 25.50 ± 0.71 | 45.60 ± 4.17 | 7.90 ± 0.57 | 10 | 3.00 ± 0.00 | 5 | 8.40 ± 0.52  | 21.90 ± 1.37 | 36.30 ± 1.49 |
| 4ILa4            | 40.80 ± 2.20                                  | 26.70 ± 1.34 | 25.60 ± 0.97 | 48.50 ± 5.10 | 8.00 ± 0.67 | 10 | 3.00 ± 0.00 | 5 | 9.40 ± 0.70  | 22.20 ± 1.69 | 37.50 ± 1.35 |
| 4Pym4            | 39.40 ± 1.35                                  | 26.10 ± 1.91 | 23.70 ± 0.67 | 44.40 ± 3.72 | 8.10 ± 0.32 | 10 | 3.40 ± 0.52 | 5 | 8.60 ± 0.70  | 22.40 ± 0.70 | 39.00 ± 1.05 |

1, body length; 2, body width; 3, length of buccal field; 4, macronucleus length; 5, kinety number; 6, number of fronto-ventral cirri; 7, number of caudal cirri; 8, number of transverse cirri; 9, kinetosome number of the median kinety; 10, number of oral membranelles; and 11, number of polygons (alveoli) adjacent to the median kinety.

**Table S3. GenBank accession numbers of the *E. nobilii* strain SSU-rRNA gene sequences**

| Strains | Accession numbers |
|---------|-------------------|
| 1QAA    | GU479378          |
| 2QAN1   | GU479379          |
| 3QAN7   | GU479380          |
| 4QN9    | GU479383          |
| 5QAA15  | GU479384          |
| 4ILa4   | GU479381          |
| 4Pyrm4  | GU479382          |
| AC-1    | GU479385          |
| AC-3    | GU479386          |
| AC-4    | EF094969          |
| AC-5    | GU479387          |
| Far     | GU479389          |
| Sop     | EF094970          |
| Ed.Po-6 | GU479388          |
| IsH3-1  | GU479390          |
| PA1-1   | GU479391          |
| PNA-1h  | GU479392          |
| PUN1    | GU479393          |

**Table S4. Input for the structure calculation and characterization of the bundle of 20 energy-minimized DYANA conformers representing the *En-A1* pheromone NMR structure**

| Quantity                                         | Value*                          |
|--------------------------------------------------|---------------------------------|
| NOE upper distance constraints <sup>†</sup>      | 877                             |
| Intraresidual                                    | 209                             |
| Short-range                                      | 235                             |
| Medium-range                                     | 204                             |
| Long-range                                       | 229                             |
| Disulfide bond distance constraints <sup>‡</sup> | 24                              |
| Dihedral angle constraints                       | 207                             |
| Residual target function value [Å <sup>2</sup> ] | 0.71 ± 0.08 (0.56–0.83)         |
| Residual NOE violations                          |                                 |
| Number ≥ 0.1 Å                                   | 6 ± 3 (2–12)                    |
| Maximum [Å]                                      | 0.13 ± 0.01 (0.11–0.16)         |
| Residual dihedral angle violations               |                                 |
| Number ≥ 2.5°                                    | 1 ± 1 (0–2)                     |
| Maximum [°]                                      | 2.61 ± 1.24 (0.13–6.43)         |
| AMBER energies [kcal/mol]                        |                                 |
| Total                                            | –1814 ± 29                      |
| van der Waals                                    | –184 ± 9                        |
| Electrostatic                                    | –2064 ± 26                      |
| Rmsd from ideal coordinates                      |                                 |
| Bond length [Å]                                  | 0.0077 ± 0.0005 (0.0071–0.0089) |
| Bond angles [°]                                  | 1.90 ± 0.10 (1.70–2.07)         |
| Rmsd from mean coordinates [Å] <sup>§</sup>      |                                 |
| Backbone (2–53)                                  | 0.34 ± 0.05 (0.26–0.48)         |
| All heavy atoms (2–53)                           | 0.65 ± 0.07 (0.53–0.77)         |
| Ramachandran plot statistics <sup>¶</sup>        |                                 |
| Most favored regions [%]                         | 74.2                            |
| Additional allowed regions [%]                   | 21.2                            |
| Generously allowed regions [%]                   | 3.5                             |
| Disallowed regions [%]                           | 1.1                             |

\*Except for the top two entries, average values and corresponding standard deviations in the 20 energy-minimized conformers are given. Minimal and maximal values are given in parentheses.

<sup>†</sup>The NOE upper distance limits reported here are those that were determined in the seventh cycle by the CANDID program.

<sup>‡</sup>Standard distance restraints for disulfide bridges were imposed for the cysteine pairs 12–38, 23–34, 30–58, and 35–47.

<sup>§</sup>The numbers in parentheses indicate the residues for which the rmsd was calculated.

<sup>¶</sup>As determined by PROCHECK.
